# Supplementary material for: Te4+-doped zero-dimensional Cs2ZnCl4 single crystals for broadband yellow light emission
Source: Royal Society of Chemistry journal article supplement (doi:10.1039/d1tc04990a), 2021-11-26
Supplement: d1tc04990a1.pdf [file d1tc04990a1.pdf]

## Electronic Supplementary Information

# Te<sup>4+</sup>-Doped Zero-Dimensional Cs<sub>2</sub>ZnCl<sub>4</sub> Single Crystals for Broadband Yellow Light Emission

Xiaoxia Liu, Chengdong Peng,\* Lijie Zhang, Daying Guo and Yuexiao Pan\*

*Key Laboratory of Carbon Materials of Zhejiang Province, College of Chemistry and  
Materials Engineering, Wenzhou University, Wenzhou 325035, P.R. China.*

*Email: cdpeng@wzu.edu.cn & yxpan@wzu.edu.cn*

*Fax&Tel: +86-577-8837-3017*

**Tables:****Table S1.** Crystal data and structure refinement for Cs<sub>2</sub>ZnCl<sub>4</sub> and Cs<sub>2</sub>ZnCl<sub>4</sub>:Te<sup>4+</sup>.

|                                           | Cs <sub>2</sub> ZnCl <sub>4</sub> | Cs <sub>2</sub> ZnCl <sub>4</sub> :Te <sup>4+</sup> |
|-------------------------------------------|-----------------------------------|-----------------------------------------------------|
| Temperature, K                            | 296(2)                            | 296(2)                                              |
| Crystal system                            | Orthorhombic                      | Orthorhombic                                        |
| space group                               | <i>Pnma</i>                       | <i>Pnma</i>                                         |
| Unit cell dimensions                      | a = 9.7749(11) Å                  | a = 9.867(10) Å                                     |
|                                           | b = 7.4136(8) Å                   | b = 7.458(8) Å                                      |
|                                           | c = 12.9810(14) Å                 | c = 12.959(13) Å                                    |
|                                           | β = 90.00 deg                     | β = 90.00 deg                                       |
| Volume/ Å <sup>3</sup> , Z                | 940.70(18), 2                     | 953.6(17), 2                                        |
| ρ <sub>calc</sub> /g cm <sup>-3</sup>     | 3.340                             | 3.294                                               |
| μ / mm <sup>-1</sup>                      | 11.282                            | 11.129                                              |
| F(000)                                    | 832                               | 832                                                 |
| θ range /deg                              | 3.77 to 25.0                      | 3.77 to 28.31                                       |
| Limiting indices                          | -11 ≤ h ≤ 10                      | -12 ≤ h ≤ 13                                        |
|                                           | -8 ≤ k ≤ 5                        | -9 ≤ k ≤ 9                                          |
|                                           | -15 ≤ l ≤ 15                      | -17 ≤ l ≤ 12                                        |
| Reflections collected                     | 3629                              | 6342                                                |
| Independent reflections                   | 869[R(int) = 0.0413]              | 850[R(int) = 0.0282]                                |
| Absorption coefficient / mm <sup>-1</sup> | 0.022                             | 0.015                                               |
| Data / restraints / parameters            | 888 / 0 / 41                      | 996 / 0 / 41                                        |
| Goodness-of-fit on F <sup>2</sup>         | 1.349                             | 1.176                                               |
| Final R indices [I > 2σ(I)]               | R1 = 0.0357,                      | R1 = 0.0757,                                        |
|                                           | wR2 = 0.0387                      | wR2 = 0.1073                                        |
| R indices (all data)                      | R1 = 0.1137,                      | R1 = 0.2248,                                        |
|                                           | wR2 = 0.1239                      | wR2 = 0.2941                                        |

$$R1 = \frac{\sum(|F_o| - |F_c|)}{\sum|F_o|}; wR2 = \left\{ \frac{\sum[w(F_o^2 - F_c^2)^2]}{\sum[w(F_o^2)]^2} \right\}^{1/2}$$

**Table S2.** The experimental mole ratio of  $\text{Te}^{4+}$  calculated from starting materials and the actual doping concentration of  $\text{Te}^{4+}$  in crystals  $\text{Cs}_2\text{ZnCl}_4$  measured in the sample by using inductive coupled plasma emission spectrometer (ICP).

| Experimental mole ratio of Te | Conc. (mg/L) | Actual doping concentration of Te |
|-------------------------------|--------------|-----------------------------------|
| 1%                            | 0.312        | 0.21%                             |
| 2%                            | 0.651        | 0.43%                             |
| 4%                            | 1.796        | 1.19%                             |
| 6%                            | 3.688        | 2.46%                             |
| 8%                            | 4.397        | 2.93%                             |
| 10%                           | 4.564        | 3.04%                             |
| 12%                           | 6.043        | 4.02%                             |

**Table S3.** Second order fitting parameters of decay at 0, 1, 2, 4, 6, 8, 10 and 12 mol%

$\text{Te}^{4+}$  doped  $\text{Cs}_2\text{ZnCl}_4$ .

| Te%         | 1     | 2     | 4     | 6     | 8     | 10    |
|-------------|-------|-------|-------|-------|-------|-------|
| $\tau$ (ns) | 62.94 | 55.42 | 54.01 | 53.22 | 53.22 | 50.87 |

Figures:

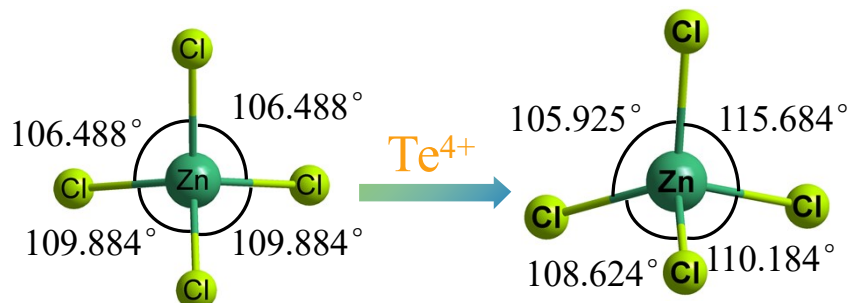

Fig. S1 The change of bond Angle during Te<sup>4+</sup> substitution.

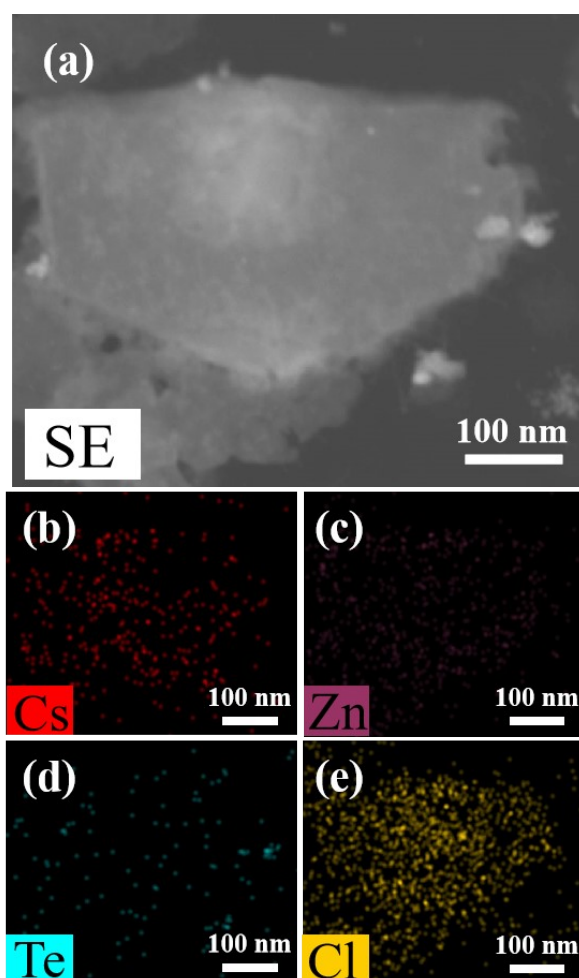

Fig. S2 (a) Elemental mapping of the Cs<sub>2</sub>ZnCl<sub>4</sub>:Te<sup>4+</sup> showing the presence of (b) caesium, (c) zinc, (d) tellurium, and (e) chlorine.

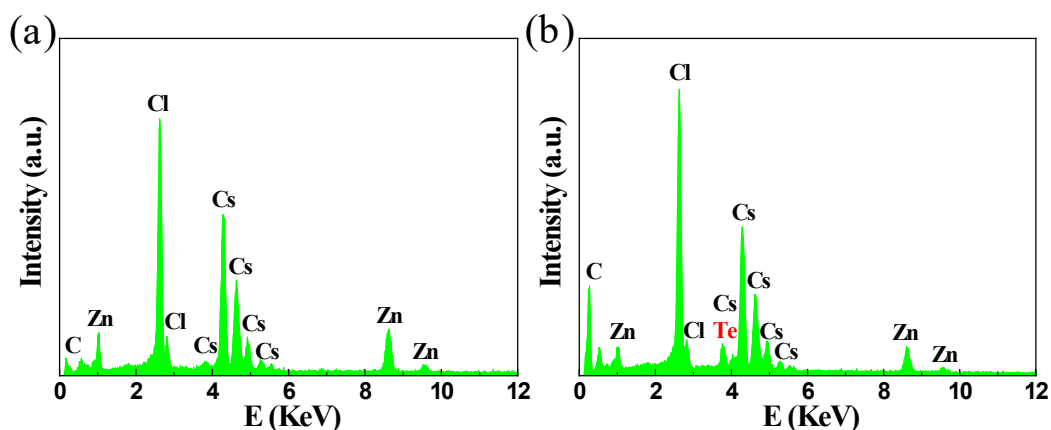

**Fig. S3** The corresponding energy dispersive spectroscopy (EDS) of the as-prepared (a) undoped  $\text{Cs}_2\text{ZnCl}_4$  and (b)  $\text{Cs}_2\text{ZnCl}_4:\text{Te}^{4+}$  sample collected on FEI Nova 200 NanoSEM instrument.

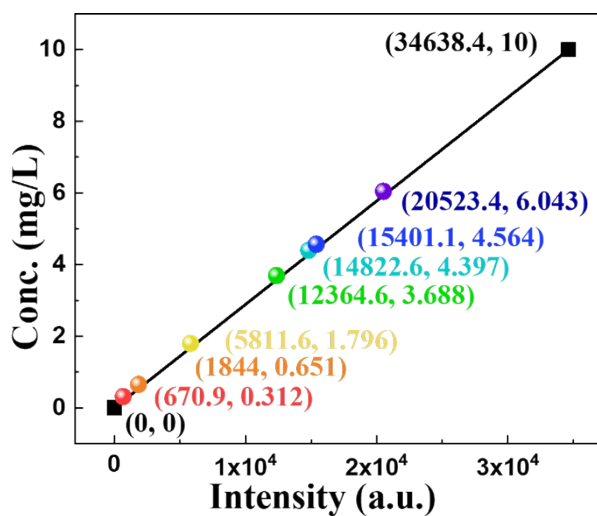

**Fig. S4** The actual doping amount of  $\text{Te}^{4+}$  at different concentrations was measured by inductive coupled plasma optical emission spectrometer (ICP-OES) is performed on PerkinElmer ICP-OES OPTIMA8000.

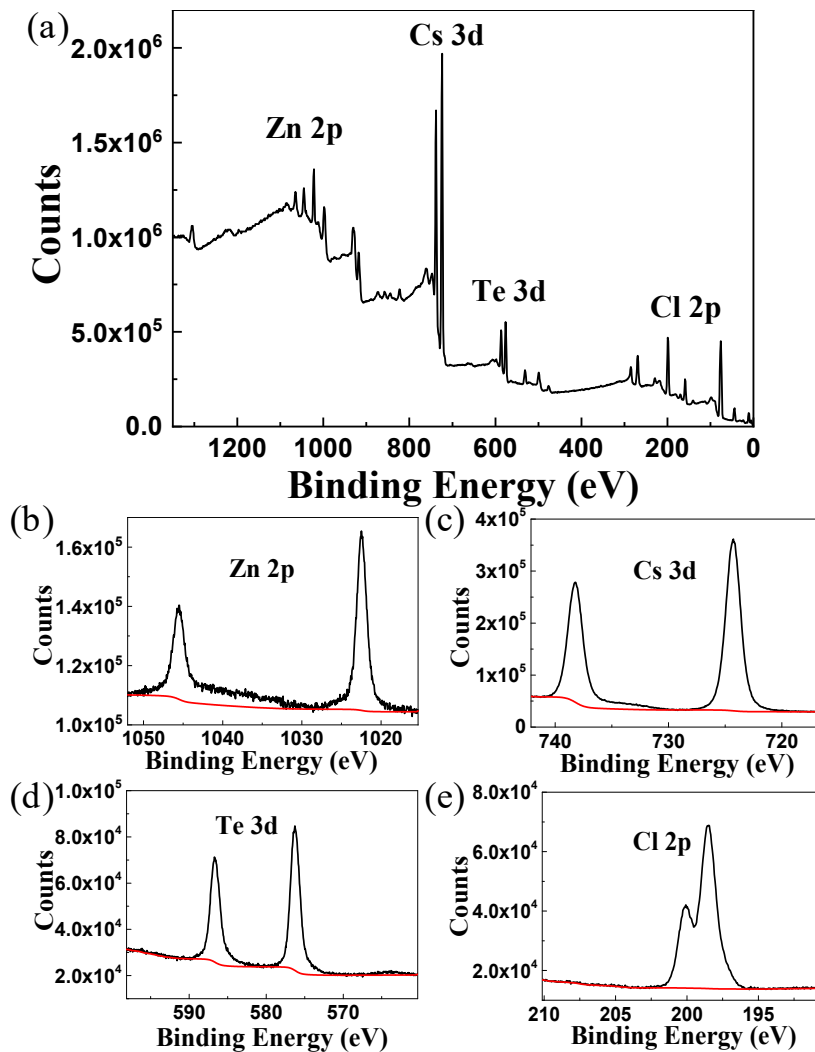

**Fig. S5** (a) The high-resolution XPS analysis of  $\text{Cs}_2\text{ZnCl}_4:\text{Te}^{4+}$  corresponding to (b) Zn 2p, (c) Cs 3d, (d) Te 3d and (e) Cl 2p, respectively, which was done with a Thermo Scientific Escalab 250 Xi instrument using monochromatic Al  $K\alpha$  radiation ( $h\nu = 1486.7$  eV).

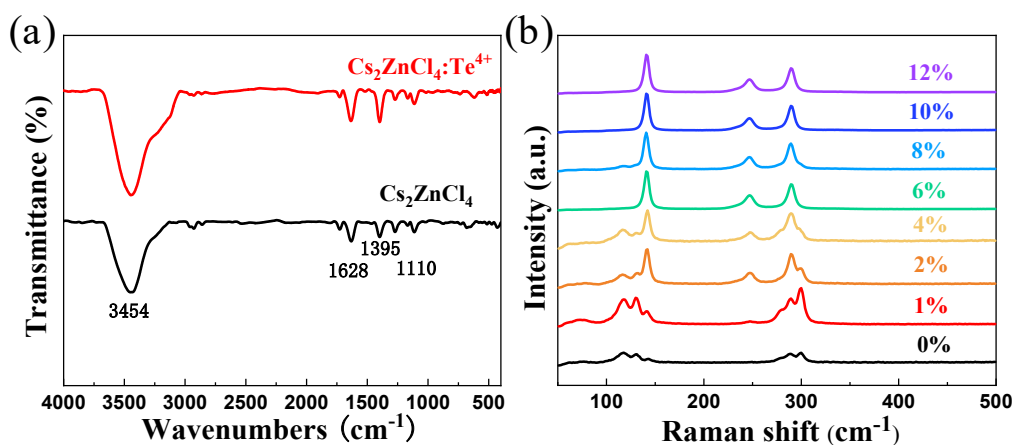

**Fig. S6** (a) FT-IR spectra of the  $\text{Cs}_2\text{ZnCl}_4$  and  $\text{Cs}_2\text{ZnCl}_4:\text{Te}^{4+}$  were recorded on a Nicolet iS20 Fourier-transform infrared spectrometer using the KBr method. Raman was performed by Renishaw inVia, and (b) the Raman spectra for  $\text{Cs}_2\text{ZnCl}_4:\text{Te}^{4+}$  doped with different concentration of  $\text{Te}^{4+}$ .

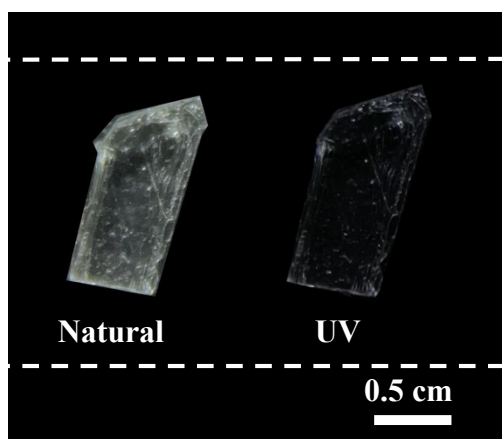

**Fig. S7** Optical microscopic images of undoped  $\text{Cs}_2\text{ZnCl}_4$  single crystal taken under natural light (left) and UV light (right).

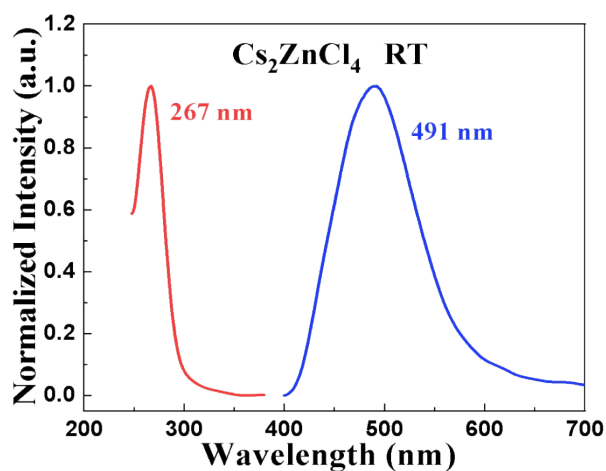

**Fig. S8** Normalized PL and PLE of  $\text{Cs}_2\text{ZnCl}_4$  at room temperature ( $\lambda_{\text{ex}} = 267 \text{ nm}$ ,  $\lambda_{\text{em}} = 491 \text{ nm}$ ).

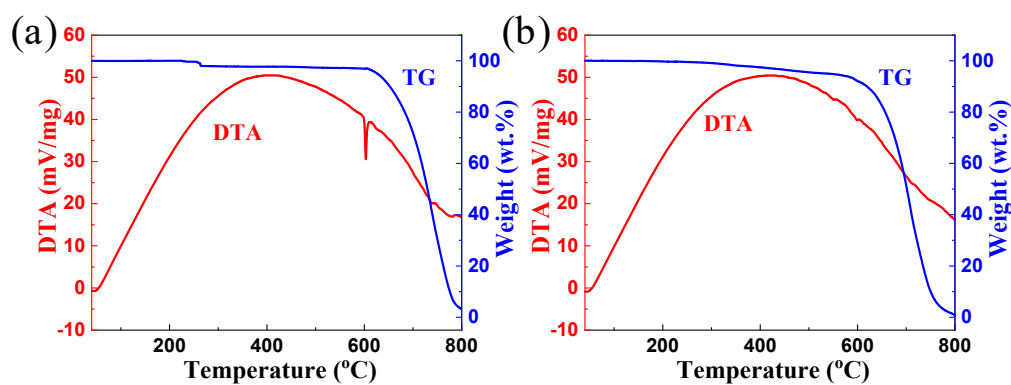

**Fig. S9** Thermogravimetrics (TG) and differential thermal analysis (DTA) graphs of as the synthesized (a)  $\text{Cs}_2\text{ZnCl}_4$  and (b)  $\text{Cs}_2\text{ZnCl}_4:\text{Te}^{4+}$  performed on a PerkinElmer Diamond TG-DTA at  $10 \text{ }^\circ\text{C}/\text{min}$  in an argon flow from room temperature to  $800 \text{ }^\circ\text{C}$ . under  $\text{N}_2$  atmosphere.



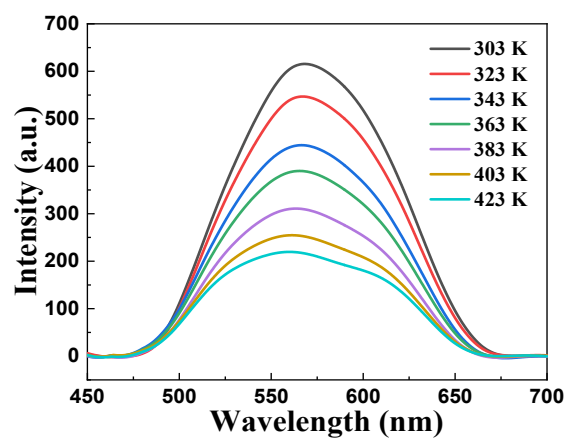

**Fig. S10** The emission intensities of  $\text{Cs}_2\text{ZnCl}_4:\text{Te}^{4+}$  dependent on the temperatures.
